# Supplementary material for: Global patterns of leaf nutrient resorption in herbaceous plants
Source: Copernicus journal article supplement (doi:10.5194/bg-2018-112), 2018-03-16
Supplement: Supplementary file 1 [file bg-2018-112-supplement.pdf]

**Details of multiple regression models results for the relationships between NRE, PRE, NRE:PRE and environmental factors (Latitude (LAT, °), mean annual precipitation (MAT, °C) and mean annual precipitation (MAP, mm)), respectively.**

Equations and  $R^2$  and  $P$  values describe the explanatory power of each model.

| <b>Group</b> | <b>Equation</b>                                                       | <b><math>R^2</math></b> | <b><math>P</math></b> |
|--------------|-----------------------------------------------------------------------|-------------------------|-----------------------|
| <b>NRE</b>   |                                                                       |                         |                       |
| All data     | $y=1.56091+0.0036\text{Lat}$                                          | 0.063                   | <b>&lt;0.0001</b>     |
|              | $y=1.74165-0.0047\text{MAT}$                                          | 0.039                   | <b>&lt;0.0001</b>     |
|              | $y=1.74711-0.0000609\text{MAP}$                                       | 0.054                   | <b>&lt;0.0001</b>     |
|              | $y=1.7205+0.283461\text{Lat}-0.038019\text{MAT}-0.002754\text{MAP}$   | 0.106                   | <b>&lt;0.0001</b>     |
| Graminoids   | $y=1.63377+0.00225\text{Lat}$                                         | 0.052                   | <b>0.037</b>          |
|              | $y=1.77788-0.00776\text{MAT}$                                         | 0.073                   | <b>&lt;0.0001</b>     |
|              | $y=1.77679-0.0000865\text{MAP}$                                       | 0.038                   | <b>0.002</b>          |
|              | $y=1.525405+0.025707\text{Lat}-0.569069\text{MAT}-0.00372\text{MAP}$  | 0.059                   | <b>0.004</b>          |
| Forbs        | $y=1.53428+0.00401\text{Lat}$                                         | 0.088                   | <b>&lt;0.0001</b>     |
|              | $y=1.71494-0.00297\text{MAT}$                                         | 0.017                   | <b>0.014</b>          |
|              | $y=1.72878-0.0000519\text{MAP}$                                       | 0.055                   | <b>&lt;0.0001</b>     |
|              | $y=1.881503+0.547313\text{Lat}+0.455467\text{MAT}-0.00249\text{MAP}$  | 0.145                   | <b>&lt;0.0001</b>     |
| Monocots     | $y=1.52058+0.00431\text{Lat}$                                         | 0.069                   | <b>&lt;0.0001</b>     |
|              | $y=1.70834-0.0015\text{MAT}$                                          | 0.002                   | 0.337                 |
|              | $y=1.73544-0.0000621\text{MAP}$                                       | 0.048                   | <b>&lt;0.0001</b>     |
|              | $y=1.923174+0.090165\text{Lat}-0.612721\text{MAT}-0.000192\text{MAP}$ | 0.102                   | <b>&lt;0.0001</b>     |
| Eudicots     | $y=1.58939+0.00319\text{Lat}$                                         | 0.058                   | <b>&lt;0.0001</b>     |
|              | $y=1.77276-0.0071\text{MAT}$                                          | 0.105                   | <b>&lt;0.0001</b>     |
|              | $y=1.76133-0.0000623\text{MAP}$                                       | 0.060                   | <b>&lt;0.0001</b>     |

|                |                                                                       |       |                   |
|----------------|-----------------------------------------------------------------------|-------|-------------------|
|                | $y=1.039314+0.514526\text{Lat}+0.47502\text{MAT}-0.00428\text{MAP}$   | 0.133 | <b>&lt;0.0001</b> |
|                |                                                                       |       |                   |
| <b>PRE</b>     |                                                                       |       |                   |
| All data       | $y=1.67742+0.00278\text{Lat}$                                         | 0.076 | <b>&lt;0.0001</b> |
|                | $y=1.82743-0.00434\text{MAT}$                                         | 0.059 | <b>&lt;0.0001</b> |
|                | $y=1.82165-0.0000405\text{MAP}$                                       | 0.055 | <b>&lt;0.0001</b> |
|                | $y=1.463987+0.256038\text{Lat}-0.152148\text{MAT}-0.000796\text{MAP}$ | 0.189 | <b>&lt;0.0001</b> |
| Graminoids     | $y=1.71335+0.00248\text{Lat}$                                         | 0.062 | <b>0.001</b>      |
|                | $y=1.86398-0.00611\text{MAT}$                                         | 0.119 | <b>&lt;0.0001</b> |
|                | $y=1.85218-0.0000485\text{MAP}$                                       | 0.041 | <b>0.007</b>      |
|                | $y=1.716721+0.150796\text{Lat}-0.743164\text{MAT}+0.001219\text{MAP}$ | 0.134 | <b>&lt;0.0001</b> |
| Forbs          | $y=1.67729+0.00234\text{Lat}$                                         | 0.049 | <b>&lt;0.0001</b> |
|                | $y=1.79375-0.00275\text{MAT}$                                         | 0.020 | <b>0.023</b>      |
|                | $y=1.79524-0.0000323\text{MAP}$                                       | 0.040 | <b>0.002</b>      |
|                | $y=1.998607+0.384289\text{Lat}+0.592512\text{MAT}-0.003873\text{MAP}$ | 0.088 | <b>0.0003</b>     |
| Monocots       | $y=1.55926+0.00504\text{Lat}$                                         | 0.162 | <b>&lt;0.0001</b> |
|                | $y=1.82846-0.00765\text{MAT}$                                         | 0.116 | <b>&lt;0.0001</b> |
|                | $y=1.82004-0.0000743\text{MAP}$                                       | 0.162 | <b>&lt;0.0001</b> |
|                | $y=1.072710+0.211078\text{Lat}-0.582170\text{MAT}+0.005599\text{MAP}$ | 0.083 | <b>0.001</b>      |
| Eudicots       | $y=1.74055+0.00176\text{Lat}$                                         | 0.042 | <b>0.003</b>      |
|                | $y=1.83857-0.00304\text{MAT}$                                         | 0.039 | <b>0.004</b>      |
|                | $y=1.82611-0.0000174\text{MAP}$                                       | 0.008 | 0.119             |
|                | $y=1.487155+0.439232\text{Lat}+0.141750\text{MAT}-0.005656\text{MAP}$ | 0.251 | <b>&lt;0.0001</b> |
|                |                                                                       |       |                   |
| <b>NRE:PRE</b> |                                                                       |       |                   |
| All data       | $y=-0.69622+0.00367\text{Lat}$                                        | 0.041 | <b>&lt;0.0001</b> |
|                | $y=-0.89795-0.00613\text{MAT}$                                        | 0.040 | <b>&lt;0.0001</b> |
|                | $y=0.8697-0.0000288\text{MAP}$                                        | 0.022 | <b>0.003</b>      |
|                | $y=0.7126+0.00346\text{Lat}-0.00631\text{MAT}+0.005972\text{MAP}$     | 0.124 | <b>&lt;0.0001</b> |

|            |                                                                      |       |                   |
|------------|----------------------------------------------------------------------|-------|-------------------|
| Graminoids | $y=0.675212+0.00327\text{Lat}$                                       | 0.016 | 0.065             |
|            | $y=0.871558-0.00767\text{MAT}$                                       | 0.035 | <b>0.011</b>      |
|            | $y=0.859-0.0000649\text{MAP}$                                        | 0.003 | 0.226             |
|            | $y=0.7986+0.001455\text{Lat}-0.006107\text{MAT}-0.0000048\text{MAP}$ | 0.026 | <b>0.263</b>      |
| Forbs      | $y=0.680155+0.00484\text{Lat}$                                       | 0.090 | <b>&lt;0.0001</b> |
|            | $y=0.931163-0.00677\text{MAT}$                                       | 0.066 | <b>0.0001</b>     |
|            | $y=0.894-0.00003\text{MAP}$                                          | 0.019 | <b>0.027</b>      |
|            | $y=0.579+0.006801\text{Lat}-0.005365\text{MAT}+0.00008941\text{MAP}$ | 0.095 | <b>0.0002</b>     |
| Monocots   | $y=0.640453+0.00426\text{Lat}$                                       | 0.017 | <b>&lt;0.05</b>   |
|            | $y=0.890308-0.0089\text{MAT}$                                        | 0.001 | 0.407             |
|            | $y=0.89722-0.0000745\text{MAP}$                                      | 0.014 | 0.268             |
|            | $y=0.8294+0.00122\text{Lat}-0.008635\text{MAT}+0.00001656\text{MAP}$ | 0.083 | <b>0.001</b>      |
| Eudicots   | $y=0.791646+0.00222\text{Lat}$                                       | 0.052 | <b>0.001</b>      |
|            | $y=0.883745-0.00548\text{MAT}$                                       | 0.072 | <b>0.0001</b>     |
|            | $y=0.8536-0.0000414\text{MAP}$                                       | 0.034 | <b>0.007</b>      |
|            | $y=0.5665+0.006125\text{Lat}-0.000483\text{MAT}-0.0000866\text{MAP}$ | 0.251 | <b>&lt;0.0001</b> |

## Literature Cited

1. Aerts R, Cornelissen JHC, van Logtestijn REP, Callaghan TV. 2007. Climate change has only a minor impact on nutrient resorption parameters in a high-latitude peatland. *Oecologia* 151:132-139.
2. Allison SD, Vitousek PM. 2004. Rapid nutrient cycling in leaf litter from invasive plants in Hawai'i. *Oecologia* 141:612-619.
3. Bertiller MB, Mazzarino MS, Carrera AL, Diehl P, Satti PE, Gobbi MC, Sain CL. 2006. Leaf strategies and soil N across a regional humidity gradient in Patagonia. *Oecologia* 148:612-624.
4. Bertiller MB, Sain CL, Carrera AL, Vargas DN. 2005. Patterns of nitrogen and phosphorus conservation in dominant perennial grasses and shrubs across an aridity gradient in Patagonia, Argentina. *Journal of Arid Environments* 62:209-223.
5. Bilgin A, Yalcin E, Kutbay HG, Kok T. 2004. Foliar N and P dynamics of *Heracleum platytaenium* (Apiaceae) in relation to edaphic characteristics along an elevation gradient in northern Turkey. *Annales Botanici Fennici* 41:85-93.
6. Bowman WD, Theodose TA, Fisk MC. 1995. Physiological and production responses of plant growth forms to increases in limiting resources in alpine tundra: implications for differential community response to environmental change. *Oecologia* 101:217-227.
7. Cakir YB, Ozbucak T, Kutaby HG, Kilic D, Bilgin A, Huseyinova R. 2010. Nitrogen and phosphorus resorption in a salt marsh in northern Turkey. *Turkey Journal of Botany* 34:311-322.
8. Campanella MV, Bertiller MB. 2008. Plant phenology, leaf traits and leaf litterfall of contrasting life forms in the arid Patagonian Monte, Argentina. *Journal of Vegetation Science* 19:75-85.
9. Campanella MV, Bertiller MB. 2011. Is N-resorption efficiency related to secondary compounds and leaf longevity in coexisting plant species of the arid Patagonian Monte, Argentina? *Austral Ecology* 36:395-402.
10. Carrera AL, Sain CL, Bertiller MB. 2000. Pattern of nitrogen conservation in shrubs and grasses in the Patagonian Monte, Argentina. *Plant Soil* 224:185-193.
11. Cartaxana P, Catarino F. 2002. Nitrogen resorption from senescing leaves of three salt marsh plant species. *Plant Ecology* 159:95-102.
12. Chapin FS, Shaver GR. 1989. Differences in growth and nutrient use among Arctic plant growth forms. *Functional Ecology* 3:73-80.
13. Demars BG, Boerner REJ. 1997. Foliar Phosphorus and Nitrogen Resorption in Three Woodland Herbs of Contrasting Phenology. *Castanea* 62:43-54.
14. Distel RA, Moretto AS, Didone NG. 2003. Nutrient resorption from senescing leaves in two stipa species native to central Argentina. *Austral Ecology* 28:210-215.
15. Dordas CA, Sioulas C. 2009. Dry matter and nitrogen accumulation, partitioning, and retranslocation in safflower (*Carthamus tinctorius* L.) as affected by nitrogen. *Field Crops Research* 110:35-43.

16. Freschet GT, Cornelissen JHC, van Logtestijn RSP, Aerts R. 2010. Substantial nutrient resorption from leaves, stems and roots in a subarctic flora: what is the link with other resource economics traits? *New Phytologist* 186:879-889.
17. Guo C, Cai JY, Qi J, Zhou HY, Li M, Hu QW. 2016. Nitrogen and phosphorus resorption of six dominant plant species in Poyang lake wetlands. *Chinese Journal of Ecology* 35:692-697.
18. Gursoy S, Kutbay HG, Kilic DD, Huseyinova R, Bilgin A, Yilmaz H. 2013. Nitrogen and phosphorus resorption in two wetland macrophytes. *Pakistan Journal of Botany* 45:1707-1714.
19. Gusewell S. 2005. Nutrient resorption of wetland graminoids is related to the type of nutrient limitation. *Functional Ecology* 19:344-354.
20. Huang JY, Yu HL, Wang B, Li LH, Xiao GJ, Yuan ZY. 2012. Nutrient resorption based on different estimations of five perennial herbaceous species from the grassland in inner Mongolia, China. *Journal of Arid Environments* 76:1-8.
21. Hobbie S, Gough L. 2002. Foliar and soil nutrients in tundra on glacial landscapes of contrasting ages in northern Alaska. *Oecologia* 131:453-462.
22. Jach-Smith LC, Jackson RD. 2015. Nitrogen conservation decreases with fertilizer addition in two perennial grass cropping systems for bioenergy. *Agriculture, Ecosystems and Environment* 204:62-71.
23. Jiang CM, Yu GR, Li YN, Cao GM, Yang ZP, Sheng WP, Yu WT. 2012. Nutrient resorption of coexistence species in alpine meadow of the Qinghai-Tibetan Plateau explain plant adaptation to nutrient-poor. *Ecological Engineering* 44:1-9.
24. Kazakou E, Garnier E, Navas ML, Roumet C, Collin C, Laurent G. 2007. Components of nutrient residence time and the leaf economics spectrum in species from Mediterranean old-fields differing in successional status. *Functional Ecology* 21:235-245.
25. Lawniczak AE. Nitrogen, phosphorus, and Potassium resorption efficiency and proficiency of four emergent Macrophytes from nutrient-rich wetlands. 2011. *Polish Journal of Environmental Studies* 20:1227-1234.
26. Li L, Gao XP, Li XY, Lin LS, Zeng FJ, Gui DW, Lu Y. 2016. Nitrogen (N) and phosphorus (P) resorption of two dominant alpine perennial grass species in response to contrasting N and P availability. *Environmental and Experimental botany* 127:37-44.
27. Li LJ, Zeng DH, Mao R, Yu ZY. 2012. Nitrogen and phosphorus resorption of *Artemisia scoparia*, *Chenopodium acuminatum*, *Cannabis sativa*, and *Phragmites communis* under nitrogen and phosphorus additions in a semi-arid grassland, China. 2012. *Plant soil Environment* 58:446-451.
28. Li X, Liu J, Fan J, Ma Y, Ding S, Zhong Z, Wang D. 2015. Combined effects of nitrogen addition and litter manipulation on nutrient resorption of *Leymus chinensis* in a semi-arid grassland of northern China. *Plant Biology* 17:9-15.
29. Li YH, Han GD, Wang Z, Wang ZW, Zhao ML, Wang SRN. 2015. Nitrogen resorption efficiency of perennial plant decreases with warming and nitrogen addition in desert steppe. *Acta Ecologica Sinica* 35:5948-5956.

30. Liang DF, Zhang JJ, Zhang ST. 2015. Patterns of nitrogen resorption in functional groups in a Tibetan alpine meadow. *Folia Geobotanica* 50:267-274.
31. Liu CC, Liu YG, Guo K, Wang SJ, Yang Y. 2014 Concentrations and resorption patterns of 13 nutrients in different plant functional types in the karst region of south-western China. *Annals of Botany* 113:873-885.
32. Lv XT, Han XG. Nutrient resorption responses to water and nitrogen amendment in semi-arid grassland of Inner Mongolia, China. 2010. 327:481-491.
33. Lv XT, Cui Q, Wang QB, Han XG. 2011. Nutrient resorption response to fire and nitrogen addition in a semi-arid grassland. *Ecological Engineering* 37:534-538.
34. Lv XT, Reed SC, Yu Q, Han XG. 2016. Nutrient resorption helps drive intra-specific coupling of foliar nitrogen and phosphorus under nutrient-enriched conditions. *Plant Soil* 398:111-120.
35. Mazzarino MJ, Bertiller M, Schlichter T, Gobbi M. 1998. Nutrient cycling in Patagonian ecosystems. *Ecologia Austral* 8:15.
36. Mao R, Song CC, Zhang XH, Wang XW, Zhang ZH. 2013. Response of leaf, sheath and stem nutrient resorption to 7 years of N addition in freshwater wetland. *Plant Soil* 364:385-394.
37. Mao R, Zeng DH, Zhang XH, Song CC. 2015. Response of plant nutrient resorption to phosphorus addition in freshwater marsh of Northeast China. *Scientific Reports* 5:8097.
38. Mao W, Li Y, Cui J, Zuo X, Zhao X. 2011. Variations in folia nutrient resorption efficiency of different plant growth forms in a temperate sandy grassland. *Polish Journal of Ecology* 59:355-365.
39. Oyarzabal M, Paruelo JM, Pino F, Oesterheld M, Lauenroth WK. 2008. Trait differences between grass species along a climatic gradient in South and North America. *Journal of Vegetation Science* 19:183-192.
40. Pastor-Pastor A, Gonzalez-Paleo L, Vilela A, Ravetta D. 2015. Age-related changes in nitrogen resorption and use efficiency in the perennial new crop *Physaria mendocina* (Brassicaceae). *Industrial Crops and Products*. 65:227-232.
41. Peri PL, Lasagno RG. 2010. Biomass, carbon and nutrient storage for dominant grasses of cold temperate steppe grasslands in southern Patagonia, Argentina. *Journal of Arid Environments* 74:23-34.
42. Quested H, Press M, Callaghan T, Cornelissen H. 2002. The hemiparasitic angiosperm *Bartsia alpina* has the potential to accelerate decomposition in sub-arctic communities. *Oecologia* 130:88-95.
43. Ratnam J, Sankaran M, Hanan NP, Grant RC, Zambatis N. 2008. Nutrient resorption patterns of plant functional groups in a tropical savanna: variation and functional significance. *Oecologia* 157:141-151.
44. Ren LY, Yuan ZY, Wang HY, Wen ZJ. 2005. Nitrogen resorption of three life-forms (trees, shrubs and grasses) in the semi-arid region of North China. *Acta Botany Boreal.-Occident. Sinica* 25:497-502.
45. Richardson SJ, Allen RB, Doherty JE. 2008. Shifts in leaf N : P ratio during resorption reflect soil P in temperate rainforest. *Functional Ecology* 22:738-745.

46. Shaver GR, Stuart Chapin F. 1991. Production: biomass relationships and element cycling in contrasting arctic vegetation types. *Ecological Monographs* 61:1-31.
47. Small E. 1972. Ecological significance of four critical elements in plants of raised *Spagnum* peat bogs. *Ecology* 53:498-503.
48. Tripathi S, Sumida A, Shibata H, Ono K, Uemura S, Kodama Y, Hara T. 2006. Leaf litterfall and decomposition of different above- and belowground parts of birch (*Betula ermanii*) trees and dwarf bamboo (*Sasa kurilensis*) shrubs in a young secondary forest in northern Japan. *Biology and Fertility of Soils* 43:237-246.
49. Wang B, Huang G, Ma J, Li Y. 2016. Responses of nutrients resorption of five desert ephemeral plants to water and nitrogen additions. *Journal of Desert Research* 36:2.
50. Yan ER, Wang XH, Guo M, Zhong Q, Zhou W. 2010. C:N:P stoichiometry across evergreen broad-leaved forests, evergreen coniferous forests and deciduous broad-leaved forests in the Tiantong region, Zhejiang. *Chinese Journal of Plant Ecology* 34:48-57.
51. Yuan ZY, Li LH, Han XG, Huang JH, Jiang GM, Wan SQ, Zhang WH, Chen QS. 2005. Nitrogen resorption from senescing leaves in 28 plant species in a semi-arid region of northern China. *Journal of Arid Environments* 63:19-202.
52. Yuan, ZY, Li LH, Han XG, Huang JH, Jiang GM, Wan SQ. 2005. Soil characteristics and nitrogen resorption in *Stipa krylovii* native to northern China. *Plant and Soil* 273:257-268.
53. Zhao GS, Xiong DP, Shi PL, Feng YF, Wu JS, Zhang XF, Zeng ZX. 2016. Leaf nitrogen resorption efficiency of *Stipa purpurea* and its determinants along a precipitation gradient on the Changtang Plateau. *Acta Ecologica Sinica* 36:3419-3428.
54. Zhao GS, Shi PL, Wu JS, Xiong DP, Zong N, Zhang XZ. 2017. Foliar nutrient resorption patterns of four functional plants along a precipitation gradient on the Tibetan Changtang Plateau. *Ecology Evolution* 00:1-12.
55. Zotz G. 2004. The resorption of phosphorus is greater than that of nitrogen in senescing leaves of vascular epiphytes from lowland Panama. *Journal of Tropical Ecology* 20:693-696.
